# Supplementary material for: NP-Scout: Machine Learning Approach for the Quantification and Visualization of the Natural Product-Likeness of Small Molecules
Source: PubMed Central journal article supplement (PMC6406893; doi:10.3390/biom9020043), 2019-01-24
Supplement: biomolecules-09-00043-s001.pdf [file biomolecules-09-00043-s001.pdf]

## Supporting Information for

# NP-Scout: Machine Learning Approach for the Quantification and Visualization of the Natural Product-Likeness of Small Molecules

Ya Chen <sup>1</sup>, Conrad Stork <sup>1</sup>, Steffen Hirte <sup>1</sup> and Johannes Kirchmair <sup>1,2,3,\*</sup>

<sup>1</sup> Center for Bioinformatics (ZBH), Department of Informatics, Faculty of Mathematics, Informatics and Natural Sciences, Universität Hamburg, 20146 Hamburg, Germany; chen@zbh.uni-hamburg.de (Y.C.); stork@zbh.uni-hamburg.de (C.S.); steffen.hirte@studium.uni-hamburg.de (S.H.)

<sup>2</sup> Department of Chemistry, University of Bergen, 5007 Bergen, Norway

<sup>3</sup> Computational Biology Unit (CBU), Department of Informatics, University of Bergen, 5008 Bergen, Norway

\* Correspondence: johannes.kirchmair@uib.no or kirchmair@zbh.uni-hamburg.de; Tel.: +47-5558-3464

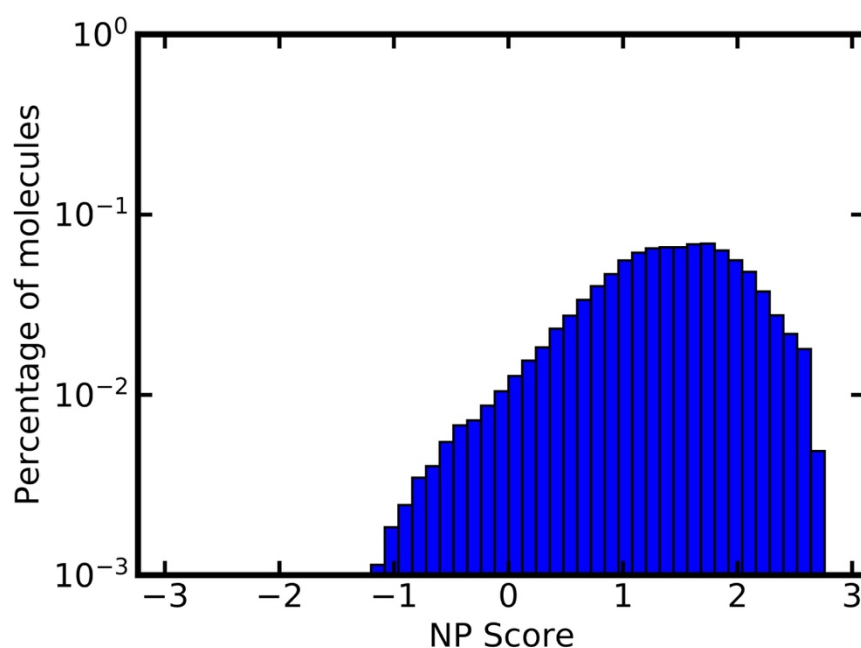

**Figure S1.** Distribution of calculated NP-likeness scores for the DNP (after removal of any compounds present in the training set). Note that the y-axis is in logarithmic scale.
